# Supplementary material for: Case report: Pain in anti-DPPX encephalitis
Source: PubMed Central journal article supplement (PMC9794743; doi:10.3389/fneur.2022.1091688), 2022-12-14
Supplement: Table_1.pdf [file Table_1.pdf]

**Table S1.** Details on reported symptoms in 65 patients with DPPX antibody-associated encephalitis

| Signs and symptoms                           | Number of patients with symptom | References              | Female/male        |
|----------------------------------------------|---------------------------------|-------------------------|--------------------|
| Gastrointestinal symptoms and/or weight loss | 2                               | Boronat et al 2013      | 1/1                |
|                                              | 2                               | Balint et al 2014       | 0/2                |
|                                              | 15                              | Tobin et al 2014        | 5/10               |
|                                              | 1                               | Piegras et al 2015      | 0/1                |
|                                              | 1                               | Stoeck et al 2015       | 1/0                |
|                                              | 1                               | Stokin et al 2015       | 0/1                |
|                                              | 1                               | Dohety et al 2017       | 0/1                |
|                                              | 1                               | Valero-Lopez et al 2017 | 1/0                |
|                                              | 9                               | Hara et al 2017         | 2/7                |
|                                              | 1                               | Zhou et al 2020         | 0/1                |
|                                              | 1                               | Deuel et al 2020        | 0/1                |
|                                              | 1                               | Wjintes et al 2020      | 0/1                |
|                                              | 1                               | Ye et al 2021           | 0/1                |
|                                              | 2                               | Mbonde et al 2021       | 1/1                |
|                                              | 1                               | Tsai et al 2021         | 0/1                |
|                                              | 1                               | Swayne 2021             | N/A                |
|                                              | 5                               | Xiao et al 2022         | 4/1                |
| 1                                            | Legendre et al 2022             | 0/1                     |                    |
| <b>Total</b>                                 | <b>47</b>                       |                         | <b>Total 15/31</b> |
| Cognitive dysfunction                        | 3                               | Boronat et al 2013      | 2/1                |
|                                              | 2                               | Balint et al 2014       | 0/2                |
|                                              | 16                              | Tobin et al 2014        | 5/11               |
|                                              | 1                               | Piegras et al 2015      | 0/1                |
|                                              | 1                               | Stoeck et al 2015       | 1/0                |
|                                              | 1                               | Stokin et al 2015       | 0/1                |
|                                              | 1                               | Dohety et al 2017       | 0/1                |
|                                              | 1                               | Valero-Lopez et al 2017 | 1/0                |
|                                              | 9                               | Hara et al 2017         | 2/7                |
|                                              | 1                               | Bien et al 2020         | 1/0                |
|                                              | 1                               | Zhou et al 2020         | 0/1                |
|                                              | 1                               | Deuel et al 2020        | 0/1                |
|                                              | 1                               | Wjintes et al 2020      | 0/1                |
|                                              | 1                               | Ye et al 2020           | 0/1                |
|                                              | 2                               | Mbonde et al 2021       | 1/1                |
|                                              | 1                               | Tsai et al 2021         | 0/1                |
|                                              | 1                               | Swayne 2021             | N/A                |
| 7                                            | Xiao et al 2022                 | 5/2                     |                    |
| 1                                            | Legendre et al 2022             | 0/1                     |                    |
| 4                                            | Miao et al 2022                 | 0/4                     |                    |
| <b>Total</b>                                 | <b>56</b>                       |                         | <b>Total 18/37</b> |
| Psychiatric symptoms                         | 3                               | Boronat et al 2013      | 2/1                |
|                                              | 5                               | Tobin et al 2014        | 4/1                |
|                                              | 1                               | Stoeck et al 2015       | 1/0                |
|                                              | 1                               | Stokin et al 2015       | 0/1                |
|                                              | 1                               | Valero-Lopez et al 2017 | 1/0                |
|                                              | 6                               | Hara et al 2017         | 1/5                |
|                                              | 1                               | Zhou et al 2020         | 0/1                |
|                                              | 1                               | Bien et al 2020         | 1/0                |
|                                              | 1                               | Deuel et al 2020        | 1/0                |
|                                              | 1                               | Mbonde et al 2021       | 1/0                |
|                                              | 1                               | Tsai et al 2021         | 0/1                |
| 2                                            | Xiao et al 2022                 | 0/2                     |                    |
| <b>Total</b>                                 | <b>24</b>                       |                         | <b>Total 12/12</b> |

|                                                                    |                                                                                                                 |                                                                                                                                                                                                                                                                                                                                                                                  |                                                                                                                                                          |
|--------------------------------------------------------------------|-----------------------------------------------------------------------------------------------------------------|----------------------------------------------------------------------------------------------------------------------------------------------------------------------------------------------------------------------------------------------------------------------------------------------------------------------------------------------------------------------------------|----------------------------------------------------------------------------------------------------------------------------------------------------------|
| CNS hyperexcitability (myoclonus, tremor, hyperreflexia, seizures) | 3<br>3<br>11<br>1<br>1<br>1<br>1<br>1<br>8<br>1<br>1<br>1<br>1<br>1<br>2<br>1<br>1<br>7<br>4<br><b>Total 49</b> | Boronat et al 2013<br>Balint et al 2014<br>Tobin et al 2014<br>Piepgras et al 2015<br>Stoeck et al 2015<br>Stokin et al 2015<br>Dohety et al 2017<br>Valero-Lopez et al 2017<br>Hara et al 2017<br>Bien et al 2020<br>Deuel et al 2020<br>Wjintes et al 2020<br>Ye et al 2021<br>Mbonde et al 2021<br>Tsai et al 2021<br>Swayne et al 2021<br>Xiao et al 2022<br>Miao et al 2022 | 2/1<br>0/3<br>1/10<br>0/1<br>1/0<br>0/1<br>0/1<br>0/1<br>1/0<br>2/6<br>1/0<br>0/1<br>0/1<br>0/1<br>1/1<br>0/1<br>N/A<br>4/3<br>0/4<br><b>Total 13/35</b> |
| Paresis                                                            | 1                                                                                                               | Tobin et al 2014                                                                                                                                                                                                                                                                                                                                                                 | 1/0                                                                                                                                                      |
| Cerebellar dysfunction                                             | 3<br>9<br>1<br>1<br>1<br>1<br>4<br>1<br>1<br>1<br>1<br>2<br>2<br>1<br>1<br><b>Total 29</b>                      | Balint et al 2014<br>Tobin et al 2014<br>Piepgras et al 2015<br>Stoeck et al 2015<br>Dohety et al 2017<br>Valero-Lopez et al 2017<br>Hara et al 2017<br>Deuel et al 2020<br>Wjintes et al 2020<br>Ye et al 2021<br>Mbonde et al 2021<br>Xiao et al 2022<br>Miao et al 2022<br>Lin et al 2022                                                                                     | 0/3<br>4/5<br>0/1<br>1/0<br>0/1<br>1/0<br>3/1<br>0/1<br>0/1<br>0/1<br>1/1<br>2/0<br>0/1<br>0/1<br><b>Total 12/17</b>                                     |
| Brain stem disorders                                               | 15<br>1<br><b>Total 16</b>                                                                                      | Tobin et al 2014<br>Miao et al 2022                                                                                                                                                                                                                                                                                                                                              | 5/10<br>0/1<br><b>Total 5/11</b>                                                                                                                         |
| Dysautonomia                                                       | 2<br>10<br>2<br>1<br>1<br>3<br><b>Total 19</b>                                                                  | Balint et al 2014<br>Tobin et al 2014<br>Hara et al 2017<br>Wjintes et al 2020<br>Mbonde et al 2021<br>Xiao et al 2022                                                                                                                                                                                                                                                           | 0/2<br>3/7<br>1/1<br>0/1<br>1/0<br>N/A<br><b>Total 5/11</b>                                                                                              |
| Sleep disorders                                                    | 1<br>9<br>1<br>1<br>1<br>2<br>1<br>1                                                                            | Boronat et al 2013<br>Tobin et al 2014<br>Piepgras et al 2015<br>Dohety et al 2017<br>Valero-Lopez et al 2017<br>Hara et al 2017<br>Zhou et al 2020<br>Deuel et al 2020                                                                                                                                                                                                          | 1/0<br>3/6<br>0/1<br>0/1<br>1/0<br>2/0<br>0/1<br>0/1                                                                                                     |

|                                  |                 |                     |                    |
|----------------------------------|-----------------|---------------------|--------------------|
|                                  | 1               | Ye et al 2021       | 0/1                |
|                                  | 2               | Mbonde et al 2021   | 1/1                |
|                                  | 5               | Xiao et al 2022     | 3/2                |
|                                  | 1               | Miao et al 2022     | 0/1                |
|                                  | <b>Total 26</b> |                     | <b>Total 11/15</b> |
| Sensory (allodynia,<br>pruritus) | 2               | Balint et al 2014   | 0/2                |
|                                  | 1               | Hara et al 2017     | 0/1                |
|                                  | 1               | Wjintes et al 2020  | 0/1                |
|                                  | 1               | Legendre et al 2022 | 0/1                |
|                                  | <b>Total 5</b>  |                     | <b>Total 0/5</b>   |
